# Supplementary material
Source: PubMed Central journal article supplement (PMC7769918)
Supplement: NIHMS1640669-supplement-Supplemental_Materials.pdf [file NIHMS1640669-supplement-Supplemental_Materials.pdf]

## **SUPPLEMENTAL MATERIALS**

Title: Junctional localization of septin 2 is required for organization of junctional proteins in static endothelial monolayers

Authors: Joanna Kim, Ph.D.\* and John A. Cooper, M.D., Ph.D.\*  
Department of Biochemistry & Molecular Biophysics\*  
Washington University School of Medicine, Saint Louis, MO, USA.

Corresponding author:

John A. Cooper

Campus Box 8231

660 S. Euclid Ave.

Saint Louis, MO 63110-1093

E-mail: [jcooper11@gmail.com](mailto:jcooper11@gmail.com)

Phone: (314) 362-3964

Fax: (314) 362-7183

## Major Resources Table

In order to allow validation and replication of experiments, all essential research materials listed in the Methods should be included in the Major Resources Table below. Authors are encouraged to use public repositories for protocols, data, code, and other materials and provide persistent identifiers and/or links to repositories when available. Authors may add or delete rows as needed.

### Animals (in vivo studies)

| Species | Vendor or Source | Background Strain | Sex | Persistent ID / URL |
|---------|------------------|-------------------|-----|---------------------|
|         |                  |                   |     |                     |
|         |                  |                   |     |                     |
|         |                  |                   |     |                     |

### Genetically Modified Animals

|                 | Species | Vendor or Source | Background Strain | Other Information | Persistent ID / URL |
|-----------------|---------|------------------|-------------------|-------------------|---------------------|
| Parent - Male   |         |                  |                   |                   |                     |
| Parent - Female |         |                  |                   |                   |                     |

### Antibodies

| Target antigen                                | Vendor or Source         | Catalog #   | Working concentration         | Lot # (preferred but not required) | Persistent ID / URL |
|-----------------------------------------------|--------------------------|-------------|-------------------------------|------------------------------------|---------------------|
| human Septin 2                                | Atlas                    | HPA018481   | IF: 1 ug/mL<br>WB: 100 ng/mL  |                                    |                     |
| human VE-cadherin                             | BD pharmingen            | 555661      | IF: 2 ug/mL<br>WB: 200 ng/mL  |                                    |                     |
| human GAPDH (clone 6C5)                       | Thermo scientific        | MA5-15738   | WB: 300 ng/mL                 |                                    |                     |
| GFP antibody (9F9.F9)                         | Rockland Immunochemicals | 600-301-215 | IF: 10 ug/mL                  |                                    |                     |
| human Nectin-2                                | R & D Systems            | AF2229      | IF: 1 ug/mL<br>WB: 100 ng/mL  |                                    |                     |
| Human Afadin (clone 851204)                   | R & D Systems            | MAB78291    | IF: 10 ug/mL<br>WB: 500 ng/mL |                                    |                     |
| PECAM-1 (JC/70A)                              | Abcam                    | Ab9498      | IF: 10 ug/mL<br>WB: 1 ug/mL   |                                    |                     |
| human ZO-1                                    | Invitrogen               | 33-9100     | IF: 5 ug/mL<br>WB: 500 ng/mL  |                                    |                     |
| Donkey anti-Goat IgG H&L (Alexa Fluor® 568)   | Abcam                    | ab175704    | IF: 5 ug/mL                   |                                    |                     |
| Donkey anti-Mouse IgG H&L (Alexa Fluor® 568)  | Abcam                    | ab150105    | IF: 5 ug/mL                   |                                    |                     |
| Donkey anti-Rabbit IgG H&L (Alexa Fluor® 568) | Abcam                    | ab150073    | IF: 5 ug/mL                   |                                    |                     |
| Rabbit anti-Goat IgG-Peroxidase conjugated    | Sigma                    | A5420       | 1:4000 dilution               |                                    |                     |
| Goat anti-Mouse IgG-Peroxidase conjugated     | Sigma                    | A4416       | 1:4000 dilution               |                                    |                     |
| Goat anti-Rabbit IgG-Peroxidase conjugated    | Sigma                    | A6154       | 1:4000 dilution               |                                    |                     |

DOI [to be added]

## DNA/cDNA Clones

| Clone Name                            | Sequence                                                                                                                                                                                                                                                                                                                                                                                                                                                                                                                                                                                                                                                                                                                                                                                                                                                                                                                                                                                                                                                                                                                                                                                                                                                                                                                                                                                                                                                                                                                                                                                                                                                                                                                                                                                                                                                                                                                                                                                                                                                                                                                                                                                                                                                                                                                                                                                                                  | Source / Repository | Persistent ID / URL                                                                                                                                                                                                                     |
|---------------------------------------|---------------------------------------------------------------------------------------------------------------------------------------------------------------------------------------------------------------------------------------------------------------------------------------------------------------------------------------------------------------------------------------------------------------------------------------------------------------------------------------------------------------------------------------------------------------------------------------------------------------------------------------------------------------------------------------------------------------------------------------------------------------------------------------------------------------------------------------------------------------------------------------------------------------------------------------------------------------------------------------------------------------------------------------------------------------------------------------------------------------------------------------------------------------------------------------------------------------------------------------------------------------------------------------------------------------------------------------------------------------------------------------------------------------------------------------------------------------------------------------------------------------------------------------------------------------------------------------------------------------------------------------------------------------------------------------------------------------------------------------------------------------------------------------------------------------------------------------------------------------------------------------------------------------------------------------------------------------------------------------------------------------------------------------------------------------------------------------------------------------------------------------------------------------------------------------------------------------------------------------------------------------------------------------------------------------------------------------------------------------------------------------------------------------------------|---------------------|-----------------------------------------------------------------------------------------------------------------------------------------------------------------------------------------------------------------------------------------|
| pBOB-Septin 2 Wt-GFP                  | <p>atgtctaagcaaacagccaactcagtttataaaatccagaaacacctggctatgttggat<br/>           ttgcaaacctccccaatcaagttcaccgaaaaatcagtgaaaaaggttttgagttcacac<br/>           tgatggtggtcggtgaaatcaggtctaggaaaaatcgactctataaacagcctatctctaa<br/>           ctgactctgacccagaagaagatcattacctggagcagcagaaaaaaattgaaagaactgtcc<br/>           agattgaggcttcaactgttgaatgaaagcgaggggtcaagctacgctgacagtggtg<br/>           tagatacccttgctatggtgacgctatcaactgcagagattggttttaagacaattatct<br/>           cctatatgtgagcaatttgagaggtacctgcatgacgagagcggcttgaacaggcgcg<br/>           acatcattgataaatagggtgcatgttctgtctttactttatctcaccttttgacatggac<br/>           ttaagcccttagatgtggcgtttatgaaggcaatacacacaagaagtgaatattgtgcctg<br/>           cacttgcaaaaagctgacactctcacctgaaaggaacgggagcggctgaaagaaaaggattc<br/>           tggatgaaattgaaagaacataaactcaaaatctatcacttacctgatgcagaatcagatg<br/>           aagatgaaagattttaaagagcagactagacttctcaaggctagcatccccattctgtggt<br/>           ttggatccaatcagttgattgaaagcaaaaggaagaaggtcagaggccgcctctaccct<br/>           ggggtgtgtggaagtggagaaccagagcacaatgacttctgaagctgagaacctatgc<br/>           tcatcaccacatgcaggatctccaggaggtgaccaggaccttcattatgaaaaacttcc<br/>           gtctgagagactcaagagagcggcaggaaggtggagaatgaggacatgaaataagacc<br/>           agatcttctggaagaaagctgagctccgcccagatgcaagagatgattgcaaggatgc<br/>           aggcagagatgcagatgcagatgcaggcggggatggcgaatggcggggctctcgggcacc<br/>           acgtggaccgggtgcccaccATGGGTGAGCAAGGGCGAGGAGCTGTTCACCGGGTGGTGC<br/>           CCATCTGGTCGAGCTGGACGGCGACGTAAACGGCCACAAGTTCAGCGTGTCCGGCGAGG<br/>           GCGAGGGCGATGCCACCTACGGCAAGCTGACCTGAAGTTCATCTGCACCACGGCAAGC<br/>           TGCCCGTGCCCTGGCCACCCTCGTGACCACCTGACCTACGGCGTGCAGTGTTCAGCC<br/>           GCTACCCCGACCCATGAAGCAGCAGCAGTCTTCAAGTCCGCCATGCCCGAAGGCTACG<br/>           TCCAGGAGCGCACCATCTTCTCAAGGACGACGGCAACTACAAGACCCGCGCGAGGTGA<br/>           AGTTCGAGGGCGACACCTTGGTGAACCGCATCGAGCTGAAGGGCATCGACTTCAAGGAGG<br/>           ACGGCAACATCTGGGGCACAAGCTGGAGTACAACACAGCCACAACGCTCTATATCA<br/>           TGGCCGACAAGCAGAAGAAGCGCATCAAGGTGAAGTTCAGATCCGCGCACAACTCGAGG<br/>           ACGGCAGCGTGCAGCTCGCCGACCACTACCAGCAGAACACCCCATCGGCGACGGCCCG<br/>           TGCTGCTGCCCGACAACCACTACCTGAGCACCAGTCCGCCCTGAGCAAGACCCCAAGC<br/>           AGAAGCGGATCACATGGTCTGCTGGAGTTCGTGACCGCCGCGGGATCACTCTCGGCA<br/>           TGGACGAGCTGACAAG</p> <p><b>Mutations: RK29,30 AA, KK 33, 34 AA</b></p> | Addgene             | For cDNA<br><a href="https://www.ncbi.nlm.nih.gov/nuccore/NM_001008491.2">https://www.ncbi.nlm.nih.gov/nuccore/NM_001008491.2</a><br>For Septin 2 wt-GFP<br><a href="http://www.addgene.org/118734/">http://www.addgene.org/118734/</a> |
| pBOB-Septin 2 PIP <sub>2</sub> BM-GFP | <p>atgtctaagcaaacagccaactcagtttataaaatccagaaacacctggctatgttggat<br/>           ttgcaaacctccccaatcaagttcaccgaaaaatcagtgaaaaaggttttgagttcacac<br/>           tgatggtggtcggtgaaatcaggtctaggaaaaatcgactctataaacagcctatctctaa<br/>           ctgactctgacccagaagaagatcattacctggagcagcagaaaaaaattgaaagaactgtcc<br/>           agattgaggcttcaactgttgaatgaaagcgaggggtcaagctacgctgacagtggtg<br/>           tagatacccttgctatggtgacgctatcaactgcagagattggttttaagacaattatct<br/>           cctatatgtgagcaatttgagaggtacctgcatgacgagagcggcttgaacaggcgcg<br/>           acatcattgataaatagggtgcatgttctgtctttactttatctcaccttttgacatggac<br/>           ttaagcccttagatgtggcgtttatgaaggcaatacacacaagaagtgaatattgtgcctg<br/>           cacttgcaaaaagctgacactctcacctgaaaggaacgggagcggctgaaagaaaaggattc<br/>           tggatgaaattgaaagaacataaactcaaaatctatcacttacctgatgcagaatcagatg<br/>           aagatgaaagattttaaagagcagactagacttctcaaggctagcatccccattctgtggt<br/>           ttggatccaatcagttgattgaaagcaaaaggaagaaggtcagaggccgcctctaccct<br/>           ggggtgtgtggaagtggagaaccagagcacaatgacttctgaagctgagaacctatgc<br/>           tcatcaccacatgcaggatctccaggaggtgaccaggaccttcattatgaaaaacttcc<br/>           gtctgagagactcaagagagcggcaggaaggtggagaatgaggacatgaaataagacc<br/>           agatcttctggaagaaagctgagctccgcccagatgcaagagatgattgcaaggatgc<br/>           aggcagagatgcagatgcagatgcaggcggggatggcgaatggcggggctctcgggcacc<br/>           acgtggaccgggtgcccaccATGGGTGAGCAAGGGCGAGGAGCTGTTCACCGGGTGGTGC<br/>           CCATCTGGTCGAGCTGGACGGCGACGTAAACGGCCACAAGTTCAGCGTGTCCGGCGAGG<br/>           GCGAGGGCGATGCCACCTACGGCAAGCTGACCTGAAGTTCATCTGCACCACGGCAAGC<br/>           TGCCCGTGCCCTGGCCACCCTCGTGACCACCTGACCTACGGCGTGCAGTGTTCAGCC<br/>           GCTACCCCGACCCATGAAGCAGCAGCAGTCTTCAAGTCCGCCATGCCCGAAGGCTACG<br/>           TCCAGGAGCGCACCATCTTCTCAAGGACGACGGCAACTACAAGACCCGCGCGAGGTGA<br/>           AGTTCGAGGGCGACACCTTGGTGAACCGCATCGAGCTGAAGGGCATCGACTTCAAGGAGG<br/>           ACGGCAACATCTGGGGCACAAGCTGGAGTACAACACAGCCACAACGCTCTATATCA<br/>           TGGCCGACAAGCAGAAGAAGCGCATCAAGGTGAAGTTCAGATCCGCGCACAACTCGAGG<br/>           ACGGCAGCGTGCAGCTCGCCGACCACTACCAGCAGAACACCCCATCGGCGACGGCCCG<br/>           TGCTGCTGCCCGACAACCACTACCTGAGCACCAGTCCGCCCTGAGCAAGACCCCAAGC<br/>           AGAAGCGGATCACATGGTCTGCTGGAGTTCGTGACCGCCGCGGGATCACTCTCGGCA<br/>           TGGACGAGCTGACAAG</p>                                                   |                     | For cDNA<br><a href="https://www.ncbi.nlm.nih.gov/nuccore/NM_001008491.2">https://www.ncbi.nlm.nih.gov/nuccore/NM_001008491.2</a>                                                                                                       |

## Cultured Cells

| Name    | Vendor or Source | Sex (F, M, or unknown) | Persistent ID / URL |
|---------|------------------|------------------------|---------------------|
| HDMVEC  | Lonza            | Male                   |                     |
| HEK293T | ATCC             | unknown                |                     |
|         |                  |                        |                     |

## Data & Code Availability

| Description | Source / Repository | Persistent ID / URL |
|-------------|---------------------|---------------------|
|             |                     |                     |
|             |                     |                     |

|  |  |  |
|--|--|--|
|  |  |  |
|--|--|--|

## Reagents

| Description                                  | Source / Repository              | Persistent ID / URL |
|----------------------------------------------|----------------------------------|---------------------|
| Tumor necrosis factor alpha (TNF- $\alpha$ ) | Gibco ThermoFisher               |                     |
| Fibronectin                                  | Sigma-Aldrich                    |                     |
| Prolong Gold                                 | Molecular Probes<br>ThermoFisher |                     |
| T4 DNA ligase                                | Invitrogen ThermoFisher          |                     |
| PfuTurbo DNA polymerase                      | Agilent Technologies             |                     |
| QuikChange Site-Directed mutagenesis kit     | Agilent Technologies             |                     |
| Bimake Cell Counting Kit-8                   | Bimake.com                       |                     |

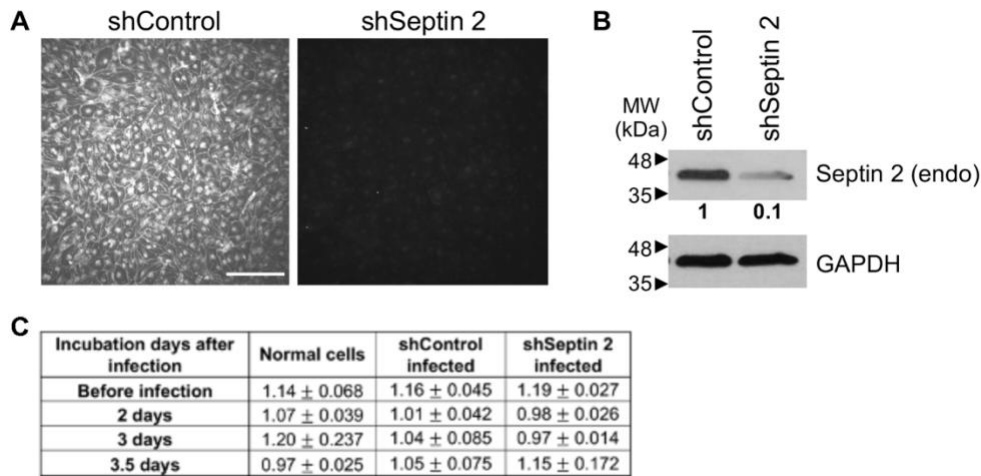

**Supplemental Figure I. Suppression level of septin 2 by lentivirus.**

(A) Immunofluorescence staining against septin 2 shows population of HDMVECs infected with lentivirus carrying shControl and shSeptin 2. Scale bar; 200  $\mu$ m. (B) Immunoblot against septin 2 shows suppression level of septin 2 by infection of lentivirus carrying shseptin 2. GAPDH is an internal loading control. Normalized band intensities using ImageJ are shown (C) Cell viability of HDMVECs following lentiviral infection. Representative data from 3 independent experiments with average values and SD is shown.

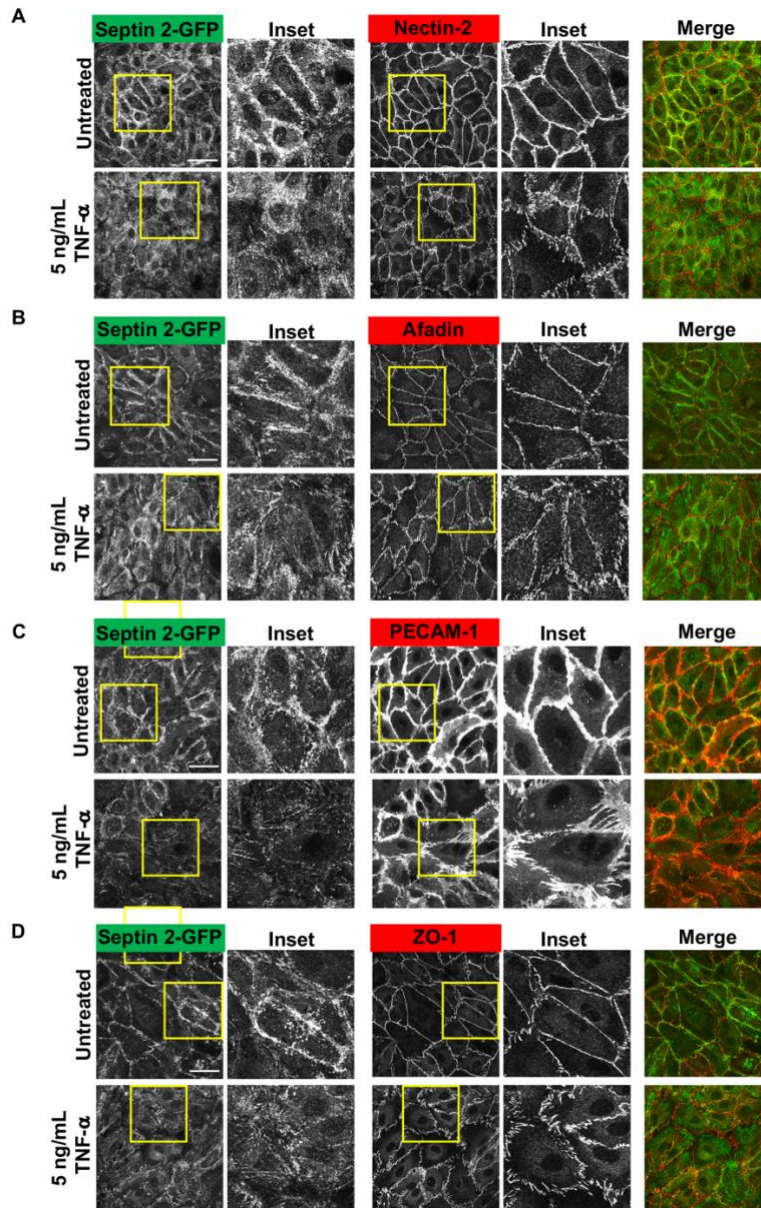

**Supplemental Figure II. 5 ng/mL TNF- $\alpha$  treatment has the same effect as 20 ng/mL TNF- $\alpha$  treatment.**

Immunofluorescence staining for endogenous septin 2 (green), cell-cell adhesion proteins (red), and actin filaments (A-D). Inset indicates enlarged area of the image. (A) Endogenous septin 2, nectin-2, and actin filaments are shown in untreated (Upper) and TNF- $\alpha$ -treated HDMVECs (Lower). (B) Endogenous septin 2, afadin, and actin filaments are shown in untreated (Upper) and TNF- $\alpha$ -treated HDMVECs (Lower). (C) Endogenous septin 2, PECAM-1, and actin filaments are shown in untreated (Upper) and TNF- $\alpha$ -treated HDMVECs (Lower). (D) Endogenous septin 2, ZO-1, and actin filaments are shown in untreated (Upper) and TNF- $\alpha$ -treated HDMVECs (Lower). Scale bars: 50  $\mu$ m.

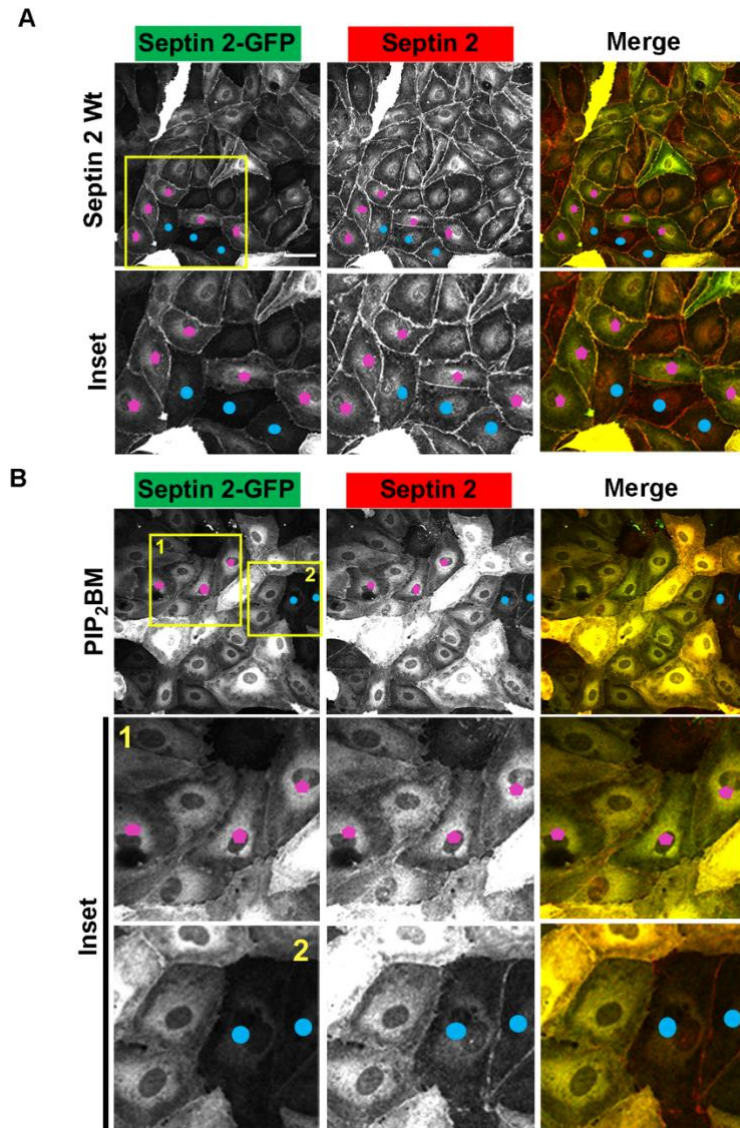

**Supplemental Figure III. Overexpression of septin 2 PIP<sub>2</sub>BM-GFP shows a dominant negative effect.**

(A) Immunofluorescence staining for overexpressed septin 2 wt-GFP with anti-GFP antibody (green) and total level of septin 2 (red) with anti-septin 2 antibody. (B) Immunofluorescence staining for overexpressed septin 2 PIP<sub>2</sub>BM-GFP with anti-GFP antibody (green) and total level of septin 2 (red) with anti-septin 2 antibody. Blue pentagons indicate the cells overexpressing septin 2 (wt and PIP<sub>2</sub>BM). Magenta dots indicate non-overexpressing cells. Scale bars: 50  $\mu$ m.

**Supplemental Table I. Criteria for blind scoring of nectin-2, afadin, and ZO-1**

| <b>Score</b> | <b>Junction structure</b>                                                                                                                       | <b>Variation</b>                                                                                                                                          | <b>Character</b>                                |
|--------------|-------------------------------------------------------------------------------------------------------------------------------------------------|-----------------------------------------------------------------------------------------------------------------------------------------------------------|-------------------------------------------------|
| 1            | One continuous solid line                                                                                                                       | Curvature or hook can exist at any region.                                                                                                                | Functionally normal<br><br>Stable and mature    |
| 2            | One continuous line with short region of extra discontinuous lines                                                                              |                                                                                                                                                           | Functionally normal                             |
|              | Two lines with one continuous.<br><br>Two lines with both curved and discontinuous but intact and solid at the tricellular junctions (the ends) |                                                                                                                                                           | Functionally normal<br><br>Immature and ruffles |
| 3            | Discontinuous lines with multiple breaks but without perpendicularity                                                                           | Discontinuity consists of many short fragments.<br><br>Discontinuity exists across whole line from the end to end including tri(multi)cellular junctions. | Functionally disrupted                          |
|              |                                                                                                                                                 | Or Discontinuous lines exist Partially                                                                                                                    |                                                 |
|              | One line with many breaks from end to end                                                                                                       |                                                                                                                                                           | Functionally disrupted                          |
| 4            | Discontinuous line(s) with perpendicularity                                                                                                     |                                                                                                                                                           | Functionally disrupted                          |
|              | One continuous line with multiple perpendicular sections                                                                                        |                                                                                                                                                           | Functionally disrupted                          |



**Supplemental Table II. Genes that show significant expression change by Septin 2 KD**

| Gene Names | Down (Log2(FC)) | Gene Names | Up (Log2(FC)) |
|------------|-----------------|------------|---------------|
| CNR1       | -5.85           | LRR38      | 5.38          |
| COL1A2     | -5.66           | MMP1       | 5.23          |
| HAPLN1     | -5.50           | PTPRR      | 4.96          |
| PLCXD3     | -5.32           | ENKUR      | 4.89          |
| TWIST2     | -5.18           | BEST3      | 4.77          |
| SEP2       | -4.64           | MAR11      | 4.64          |
| PRR15      | -4.63           | NCKAP5     | 4.62          |
| SPOCD1     | -4.62           | ADGRG4     | 4.59          |
| NUDT11     | -4.37           | SORL1      | 4.45          |
| ESX1       | -4.21           | NOG        | 4.32          |
| VCAN       | -4.15           | CYGB       | 4.27          |
| RCAN3      | -4.06           | SLC7A14    | 4.02          |
| SLCO4A1    | -3.94           | EPN3       | 3.99          |
| CBR3       | -3.87           | CD22       | 3.98          |
| NEIL3      | -3.86           | KCNH3      | 3.90          |
| CLMP       | -3.84           | TMEM236    | 3.71          |
| SLC7A2     | -3.83           | MAR4       | 3.64          |
| CENPM      | -3.66           | AL683807.1 | 3.62          |
| UHRF1      | -3.53           | CD226      | 3.58          |
| ENOX1      | -3.49           | C3AR1      | 3.56          |
| CAMK4      | -3.46           | HIST1H2BC  | 3.56          |
| G0S2       | -3.44           | COL17A1    | 3.56          |
| SAPCD2     | -3.40           | BCAN       | 3.52          |
| CRISPLD2   | -3.39           | JPH2       | 3.49          |
| GBP2       | -3.39           | ELFN2      | 3.40          |
| CDKN2C     | -3.38           | ADAM12     | 3.38          |
| COL8A2     | -3.38           | NPAS3      | 3.38          |
| CDC20      | -3.33           | COLQ       | 3.37          |
| PKMYT1     | -3.33           | HIF1A-AS2  | 3.36          |
| PCDH10     | -3.31           | AL353740.1 | 3.35          |
| CDC25C     | -3.30           | HDAC9      | 3.30          |
| CBLN2      | -3.25           | CLSTN2     | 3.17          |
| FSD1       | -3.24           | LINC01186  | 3.15          |
| UBE2C      | -3.23           | XYLT1      | 3.15          |
| GTSE1      | -3.23           | PCDH12     | 3.12          |
| EDIL3      | -3.22           | CLDN3      | 3.04          |
| FAM111B    | -3.21           | GATA3      | 3.03          |
| GLIPR1     | -3.21           | SMIM10L2A  | 3.02          |
| FAM167A    | -3.20           | HIST1H2AD  | 2.96          |
| HTR1B      | -3.18           | DPEP1      | 2.95          |
| MCM10      | -3.16           | CYTL1      | 2.94          |
| CLSPN      | -3.16           | TRAC       | 2.89          |
| ALDH1L2    | -3.13           | TFEC       | 2.82          |

|            |       |
|------------|-------|
| NUF2       | -3.12 |
| PTGS2      | -3.10 |
| TK1        | -3.04 |
| KCTD16     | -3.03 |
| SHCBP1     | -3.03 |
| PIMREG     | -3.00 |
| CCNB2      | -2.98 |
| NDRG4      | -2.98 |
| BUB1       | -2.97 |
| SPC25      | -2.95 |
| CLIC3      | -2.95 |
| KIF14      | -2.94 |
| RAB20      | -2.94 |
| MYBL2      | -2.94 |
| SKA1       | -2.93 |
| NDC80      | -2.93 |
| BMPER      | -2.92 |
| FAM129A    | -2.92 |
| ERCC6L     | -2.91 |
| PLK1       | -2.90 |
| SUSD5      | -2.90 |
| ESCO2      | -2.90 |
| CKAP2L     | -2.88 |
| PBK        | -2.86 |
| DLGAP5     | -2.86 |
| MEST       | -2.86 |
| KIF20A     | -2.84 |
| KIF18B     | -2.84 |
| CEP55      | -2.82 |
| HMMR       | -2.81 |
| BLM        | -2.80 |
| AC091057.1 | -2.79 |
| PLA1A      | -2.79 |
| KIF4A      | -2.78 |
| ORC1       | -2.77 |
| KHK        | -2.77 |
| SH3BP1     | -2.77 |
| WDR62      | -2.76 |
| CDC45      | -2.76 |
| CIT        | -2.76 |
| BUB1B      | -2.76 |
| POLE2      | -2.75 |
| EXO1       | -2.75 |
| HJURP      | -2.75 |
| RRM2       | -2.74 |

|            |      |
|------------|------|
| NR4A1      | 2.75 |
| PGK1.00    | 2.69 |
| ACOX2      | 2.68 |
| HIST1H2BD  | 2.64 |
| TMC8       | 2.57 |
| IL16       | 2.57 |
| LOXL4      | 2.50 |
| AL359643.2 | 2.50 |
| CPM        | 2.49 |
| HIST1H2AC  | 2.46 |
| CST6       | 2.46 |
| KCNJ15     | 2.44 |
| GNA15      | 2.44 |
| TSPAN1     | 2.36 |
| ACER2      | 2.35 |
| CCND2      | 2.33 |
| TMC7       | 2.32 |
| WDR66      | 2.31 |
| HIST1H2BG  | 2.30 |
| AL121718.1 | 2.28 |
| LINC01480  | 2.24 |
| MMP28      | 2.24 |
| LINC02356  | 2.23 |
| FLT1       | 2.22 |
| DCBLD2     | 2.21 |
| ANO4       | 2.20 |
| NOXA1      | 2.14 |
| KRT15      | 2.13 |
| LHX6       | 2.10 |
| NR5A2      | 2.10 |
| LINC01836  | 2.10 |
| ZNF429     | 2.08 |
| NT5E       | 2.08 |
| SFXN1      | 2.08 |
| MAP2       | 2.05 |
| LYNX1      | 2.03 |
| HIST1H3D   | 2.02 |
| LNCOG      | 2.01 |
| DGKI       | 1.97 |
| MYLK2      | 1.96 |
| GABRP      | 1.95 |
| CFAP57     | 1.94 |
| ACVR2B     | 1.93 |
| AL139280.1 | 1.93 |
| CEACAM19   | 1.92 |

|          |       |
|----------|-------|
| RRM2     | -2.74 |
| E2F1     | -2.74 |
| AURKB    | -2.74 |
| E2F8     | -2.74 |
| KIF2C    | -2.74 |
| NSG1     | -2.73 |
| KIF15    | -2.72 |
| NUSAP1   | -2.72 |
| ASF1B    | -2.70 |
| BIRC5    | -2.70 |
| NCAPH    | -2.70 |
| RAD54L   | -2.69 |
| MKI67    | -2.69 |
| NEK2     | -2.69 |
| CENPA    | -2.69 |
| GINS2    | -2.67 |
| HACD4    | -2.66 |
| CDCA8    | -2.66 |
| HEY2     | -2.65 |
| ASPM     | -2.64 |
| SPC24    | -2.63 |
| CDCA3    | -2.63 |
| HSD3B7   | -2.63 |
| DRAXIN   | -2.62 |
| MXD3     | -2.62 |
| DEPDC1B  | -2.61 |
| TTK      | -2.61 |
| KIF18A   | -2.61 |
| TICRR    | -2.60 |
| BRIP1    | -2.60 |
| KNL1     | -2.60 |
| TICAM2   | -2.60 |
| STMN3    | -2.59 |
| NEO1     | -2.58 |
| PRR11    | -2.58 |
| TCF19    | -2.58 |
| RAD51AP1 | -2.58 |
| SLC39A8  | -2.53 |
| TROAP    | -2.53 |
| NCAPG    | -2.52 |
| ENTPD6   | -2.52 |
| PIM1     | -2.51 |
| MICAL1   | -2.51 |
| C20orf27 | -2.49 |
| IMPA2    | -2.48 |

|            |      |
|------------|------|
| SLC6A4     | 1.91 |
| PCSK6      | 1.89 |
| TXLNB      | 1.89 |
| ITM2A      | 1.88 |
| GPIHBP1    | 1.87 |
| TTC30B     | 1.85 |
| BCHE       | 1.84 |
| SLC16A6    | 1.83 |
| FAM107A    | 1.83 |
| MYO7A      | 1.81 |
| SPNS3      | 1.79 |
| CLMN       | 1.78 |
| SLC26A2    | 1.78 |
| SLC2A9     | 1.77 |
| ARHGEF16   | 1.77 |
| SRPX2      | 1.76 |
| ANKRD46    | 1.76 |
| ADAM9      | 1.76 |
| KLHL6      | 1.75 |
| SULT1A1    | 1.75 |
| PLCXD2     | 1.74 |
| FUCA1      | 1.73 |
| LRP4       | 1.72 |
| ASTN2      | 1.66 |
| LYRM9      | 1.66 |
| HIST1H2BK  | 1.66 |
| CETP       | 1.65 |
| HSPA4L     | 1.64 |
| CD274      | 1.64 |
| SLC39A6    | 1.62 |
| PPME1      | 1.60 |
| ITM2C      | 1.59 |
| CMTM4      | 1.59 |
| TMEM87B    | 1.58 |
| PPM1H      | 1.58 |
| AC243960.3 | 1.58 |
| SCAMP5     | 1.58 |
| PTPRU      | 1.58 |
| RNASET2    | 1.57 |
| PDE6A      | 1.57 |
| PTCHD4     | 1.57 |
| PRKCE      | 1.57 |
| WNT3       | 1.56 |
| TGFA       | 1.55 |
| FAS        | 1.54 |

|           |       |           |      |
|-----------|-------|-----------|------|
| PSRC1     | -2.47 | SESN1     | 1.54 |
| IQGAP3    | -2.46 | TLR1      | 1.54 |
| WDR76     | -2.46 | MEGF6     | 1.53 |
| ARHGAP11A | -2.46 | MYCT1     | 1.53 |
| SLFN11    | -2.45 | OSTM1     | 1.53 |
| GPR162    | -2.44 | RAB11FIP2 | 1.52 |
| PCLAF     | -2.43 | KRT80     | 1.52 |
| SGO1      | -2.42 | NEDD4L    | 1.50 |
| HASPIN    | -2.42 | TNFRSF10C | 1.50 |
| DIXDC1    | -2.41 | MAPRE3    | 1.49 |
| HMOX1     | -2.41 | IL1RAP    | 1.49 |
| AKR1C1    | -2.41 | HIST1H1C  | 1.48 |
| ANLN      | -2.40 | GADD45A   | 1.48 |
| CENPE     | -2.39 | MERTK     | 1.48 |
| CDCA5     | -2.39 | VSIR      | 1.47 |
| FKBP1B    | -2.38 | UGCG      | 1.46 |
| PLK4      | -2.38 | VAV3      | 1.46 |
| MPZL2     | -2.37 | EPB41L1   | 1.46 |
| MELK      | -2.37 | HIST1H2AG | 1.46 |
| KREMEN1   | -2.37 | PLAU      | 1.46 |
| CENPO     | -2.37 | ADGRG6    | 1.45 |
| PTTG1     | -2.36 | BACH2     | 1.45 |
| EHBP1L1   | -2.36 | SRGAP3    | 1.43 |
| CDT1      | -2.36 | ST8SIA4   | 1.43 |
| IL7R      | -2.34 | SPATA18   | 1.43 |
| PRC1      | -2.34 | PHTF2     | 1.42 |
| TMEM158   | -2.33 | MIR503HG  | 1.42 |
| FOXM1     | -2.33 | MYO1F     | 1.41 |
| KIF11     | -2.33 | PIEZO2    | 1.41 |
| SPAG5     | -2.33 | POU2F2    | 1.41 |
| KIF23     | -2.33 | PRNP      | 1.40 |
| CCNB1     | -2.33 | ARHGAP25  | 1.40 |
| TOP2A     | -2.32 | YOD1      | 1.39 |
| LMNB1     | -2.31 | HIST1H4I  | 1.38 |
| CIP2A     | -2.30 | CDKN1A    | 1.38 |
| CENPI     | -2.30 | LINC01094 | 1.38 |
| HHIPL1    | -2.29 | PTPRN2    | 1.38 |
| SKA3      | -2.29 | DCP2      | 1.38 |
| FAM20C    | -2.28 | RRM2B     | 1.38 |
| CCNA2     | -2.27 | CFAP54    | 1.37 |
| ABCA6     | -2.27 | KLHL28    | 1.37 |
| ADAMTS4   | -2.26 | LYSMD1    | 1.37 |
| POLQ      | -2.25 | TNFRSF10B | 1.36 |
| KIFC1     | -2.23 | MRC1      | 1.36 |
| FBLN5     | -2.23 | ERO1A     | 1.36 |

|          |       |
|----------|-------|
| CDCA2    | -2.22 |
| BASP1    | -2.22 |
| CHEK1    | -2.21 |
| CENPW    | -2.20 |
| MAD2L1   | -2.19 |
| KIF24    | -2.18 |
| TPX2     | -2.18 |
| FANCA    | -2.18 |
| CSRP2    | -2.18 |
| S1PR3    | -2.17 |
| S1PR3    | -2.17 |
| MCM4     | -2.17 |
| CDC6     | -2.17 |
| CXCL5    | -2.17 |
| MCM2     | -2.14 |
| NCEH1    | -2.14 |
| PTGER4   | -2.12 |
| RFC3     | -2.12 |
| CAPG     | -2.12 |
| TMCC2    | -2.11 |
| DPYSL3   | -2.11 |
| APOL4    | -2.09 |
| ESPL1    | -2.09 |
| ASB13    | -2.09 |
| SGO2     | -2.08 |
| RACGAP1  | -2.07 |
| LRRCC1   | -2.06 |
| CASZ1    | -2.06 |
| LIPG     | -2.06 |
| H1FX     | -2.05 |
| UBE2T    | -2.05 |
| CDC7     | -2.05 |
| STAC     | -2.04 |
| CDK1     | -2.03 |
| CENPF    | -2.02 |
| NAALADL1 | -2.02 |
| PASK     | -2.00 |
| NCAPG2   | -2.00 |
| BRI3BP   | -2.00 |
| FAM83D   | -2.00 |
| SCARA3   | -1.99 |
| DEPDC1   | -1.99 |
| RECQL4   | -1.99 |
| EME1     | -1.99 |
| FMNL1    | -1.98 |

|           |      |
|-----------|------|
| LNX1      | 1.36 |
| ZNF493    | 1.36 |
| KBTBD8    | 1.36 |
| SLC2A4    | 1.35 |
| B3GLCT    | 1.33 |
| E2F5      | 1.33 |
| LINC02188 | 1.33 |
| BACH1     | 1.32 |
| PLA2G4C   | 1.32 |
| LIFR      | 1.30 |
| SLC25A45  | 1.30 |
| ALS2CL    | 1.29 |
| TRAPPC6A  | 1.29 |
| CTSD      | 1.29 |
| FJX1      | 1.29 |
| VEGFA     | 1.29 |
| C5orf15   | 1.28 |
| TTC30A    | 1.28 |
| CPEB3     | 1.27 |
| PTPRS     | 1.27 |
| FAM214A   | 1.27 |
| CBX7      | 1.27 |
| SGSM1     | 1.27 |
| SLC25A13  | 1.27 |
| PHACTR2   | 1.27 |
| CDKN2B    | 1.27 |
| MAPK6     | 1.26 |
| INKA2     | 1.26 |
| CDH5      | 1.26 |
| GPR143    | 1.26 |
| RIC1      | 1.25 |
| AJUBA     | 1.25 |
| THBD      | 1.25 |
| PCMTD1    | 1.25 |
| TCAF2     | 1.24 |
| CYYR1     | 1.24 |
| LINC01679 | 1.24 |
| DENND1B   | 1.23 |
| CLIP4     | 1.23 |
| GLRB      | 1.23 |
| HOXA1     | 1.22 |
| BRWD3     | 1.22 |
| SLCO2B1   | 1.22 |
| REPS2     | 1.22 |
| B4GALT4   | 1.21 |

|            |       |          |      |
|------------|-------|----------|------|
| FAM84A     | -1.98 | PLK2     | 1.19 |
| SLC20A1    | -1.98 | DENND5B  | 1.19 |
| CTDSP1     | -1.98 | ITGA3    | 1.19 |
| PITPNM1    | -1.96 | INPP4B   | 1.19 |
| H2AFY      | -1.95 | SLC22A18 | 1.18 |
| SALL2      | -1.94 | HELB     | 1.17 |
| GPR37      | -1.93 | PBXIP1   | 1.17 |
| C1orf112   | -1.92 | LRP12    | 1.17 |
| PRDX1      | -1.90 | SLC49A4  | 1.16 |
| CDCA7      | -1.90 | LRG1     | 1.16 |
| ETV4       | -1.88 | FRS2     | 1.16 |
| MEX3B      | -1.88 | SLC35G2  | 1.16 |
| MCM6       | -1.88 | ZNF626   | 1.16 |
| OST4       | -1.88 | AMER1    | 1.15 |
| CENPU      | -1.88 | ARSB     | 1.14 |
| H2AFX      | -1.87 | OLFML2A  | 1.14 |
| FLNA       | -1.87 | DKK3.00  | 1.14 |
| PFKFB3     | -1.87 | C1orf56  | 1.14 |
| TGFB1I1    | -1.87 | DICER1   | 1.13 |
| GIN51      | -1.87 | SDSL     | 1.13 |
| CLEC11A    | -1.87 | PDE4D    | 1.13 |
| AKR1B1     | -1.87 | IL11RA   | 1.13 |
| MIEN1      | -1.87 | AK9      | 1.13 |
| ORC6       | -1.86 | TCTN1    | 1.12 |
| OXCT1      | -1.85 | TSKU     | 1.12 |
| SUSD2      | -1.85 | DDAH1    | 1.12 |
| BRCA2      | -1.85 | CAVIN2   | 1.12 |
| SRF        | -1.85 | LRPAP1   | 1.12 |
| ANKLE1     | -1.84 | SMURF2   | 1.12 |
| PYGB       | -1.84 | LDLRAP1  | 1.12 |
| GIN54      | -1.83 | RMND5A   | 1.11 |
| LSM14B     | -1.83 | HMGA2    | 1.11 |
| TRAIP      | -1.83 | MPZL3    | 1.11 |
| STIL       | -1.83 | PVR      | 1.11 |
| SAT1       | -1.82 | TMEM64   | 1.10 |
| RAC3       | -1.81 | PTP4A3   | 1.10 |
| NAGS       | -1.81 | LNPK     | 1.10 |
| NPTX2      | -1.81 | STX3     | 1.10 |
| PSMC3IP    | -1.80 | LY96     | 1.10 |
| AC103746.1 | -1.80 | C8orf58  | 1.10 |
| B4GALT1    | -1.79 | SGPP1    | 1.10 |
| HELLS      | -1.79 | TUSC2    | 1.09 |
| FSCN1      | -1.79 | CREBRF   | 1.08 |
| AIFM2      | -1.78 | GALNT7   | 1.08 |
| UNC13B     | -1.78 | MAMLD1   | 1.08 |

|          |       |
|----------|-------|
| KIF20B   | -1.78 |
| CTSH     | -1.78 |
| ATP6V0E2 | -1.76 |
| RFLNA    | -1.76 |
| RFLNA    | -1.76 |
| MID1IP1  | -1.76 |
| DDIAS    | -1.75 |
| DTL      | -1.75 |
| TENT5A   | -1.75 |
| TRIP13   | -1.74 |
| IGFBP6   | -1.74 |
| ACOT11   | -1.74 |
| MGAT5    | -1.74 |
| TCAF1    | -1.72 |
| PAQR4    | -1.72 |
| FNDC11   | -1.72 |
| MYRF     | -1.72 |
| PC       | -1.72 |
| AGAP2    | -1.71 |
| SORD     | -1.71 |
| LY75     | -1.70 |
| SHMT1    | -1.70 |
| ZWINT    | -1.70 |
| SEMA3D   | -1.69 |
| CHAF1A   | -1.69 |
| VEGFC    | -1.68 |
| MBOAT1   | -1.68 |
| KIF21B   | -1.68 |
| CALHM2   | -1.67 |
| WDR4     | -1.66 |
| PDLIM1   | -1.65 |
| LGALS1   | -1.65 |
| NUDT1    | -1.64 |
| UAP1L1   | -1.63 |
| RBL1     | -1.63 |
| CBX2     | -1.63 |
| CCNF     | -1.62 |
| ZNF703   | -1.61 |
| AURKA    | -1.61 |
| KIF22    | -1.61 |
| CLDN7    | -1.61 |
| HMGB3    | -1.61 |
| PTPN9    | -1.60 |
| ZEB2     | -1.60 |
| FUT8     | -1.59 |

|           |      |
|-----------|------|
| SERINC1   | 1.08 |
| CEACAM1   | 1.08 |
| OCIAD2    | 1.07 |
| RTTN      | 1.07 |
| RAMP2-AS1 | 1.06 |
| NMT2      | 1.06 |
| STN1.00   | 1.06 |
| MAN2A2    | 1.06 |
| TMEM68    | 1.05 |
| DDX3Y     | 1.05 |
| DLC1      | 1.05 |
| KLHL24    | 1.05 |
| ATP9A     | 1.04 |
| ENTPD7    | 1.04 |
| C1D       | 1.04 |
| PRKAB1    | 1.03 |
| GPX8      | 1.03 |
| UHMK1     | 1.03 |
| DPY19L3   | 1.03 |
| PALD1     | 1.03 |
| SLC39A11  | 1.03 |
| LCOR      | 1.02 |
| LMBR1L    | 1.02 |
| FAM91A1   | 1.02 |
| MAR9      | 1.02 |
| PTPRE     | 1.01 |
| NAGLU     | 1.01 |
| ZNF462    | 1.01 |
| BRWD1     | 1.01 |
| SLC16A13  | 1.01 |
| RHPN1     | 1.01 |
| NUDT7     | 1.00 |
| RAMAC     | 1.00 |
| SNX4      | 0.99 |
| GNS       | 0.99 |
| PPARA     | 0.99 |
| TMCC1     | 0.99 |
| MAP3K2    | 0.99 |
| TIGAR     | 0.98 |
| STRADB    | 0.97 |
| TXNRD2    | 0.97 |
| ITGB5     | 0.97 |
| RPS6KA3   | 0.97 |
| PLCG2     | 0.97 |
| IL17D     | 0.97 |

|           |       |
|-----------|-------|
| HEY1      | -1.59 |
| MBD3      | -1.59 |
| CLIP2     | -1.59 |
| ATAD2     | -1.59 |
| KIAA0513  | -1.58 |
| GPSM2     | -1.58 |
| BRCA1     | -1.58 |
| BIN1      | -1.58 |
| GIN53     | -1.58 |
| INCENP    | -1.58 |
| C1QTNF1   | -1.58 |
| NACC1     | -1.57 |
| MBOAT2    | -1.57 |
| B3GALT6   | -1.55 |
| PFN1      | -1.54 |
| SRPX      | -1.54 |
| SUN2      | -1.54 |
| VPS51     | -1.54 |
| SCUBE2    | -1.54 |
| WDHD1     | -1.53 |
| LMAN2     | -1.53 |
| RAD51     | -1.53 |
| TACC3     | -1.53 |
| SMPD4     | -1.53 |
| NEXN      | -1.53 |
| SIX1      | -1.52 |
| GCH1      | -1.52 |
| ERMP1     | -1.52 |
| OSBPL6    | -1.51 |
| THG1L     | -1.51 |
| DLGAP1    | -1.51 |
| MTCH2     | -1.50 |
| SPHK1     | -1.50 |
| MRPS27    | -1.50 |
| C4orf46   | -1.50 |
| PPIH      | -1.49 |
| SNCA      | -1.49 |
| FAM171A1  | -1.49 |
| CDC42EP4  | -1.49 |
| LINC00607 | -1.49 |
| LBR       | -1.49 |
| TNFAIP8   | -1.49 |
| ETS1      | -1.48 |
| IDH2      | -1.48 |
| SNHG19    | -1.47 |

|           |      |
|-----------|------|
| C1QTNF6   | 0.96 |
| PRKACB    | 0.96 |
| BTBD3     | 0.96 |
| ZBTB18    | 0.96 |
| BMF       | 0.96 |
| BTD       | 0.95 |
| MAP1LC3B  | 0.95 |
| WNK4      | 0.95 |
| MGST2     | 0.95 |
| LONRF1    | 0.95 |
| SLC2A10   | 0.95 |
| HIST2H2BE | 0.95 |
| RHOBTB1   | 0.95 |
| CASP4     | 0.95 |
| KHNYN     | 0.95 |
| GABARAPL1 | 0.94 |
| OSBP2     | 0.94 |
| ARHGAP45  | 0.94 |
| PDIA5     | 0.94 |
| TM7SF3    | 0.94 |
| SPTBN5    | 0.93 |
| CD164     | 0.93 |
| IQCK      | 0.93 |
| LMO2      | 0.93 |
| OSCP1     | 0.93 |
| GGT1      | 0.93 |
| LATS2     | 0.93 |
| SLC12A4   | 0.92 |
| PPP3CB    | 0.92 |
| FAM84B    | 0.92 |
| MBNL2     | 0.92 |
| TMEM254   | 0.92 |
| MRS2      | 0.92 |
| SH3D19    | 0.92 |
| NDUFA8    | 0.91 |
| DOCK7     | 0.91 |
| TUFT1     | 0.91 |
| YBX3      | 0.91 |
| LMLN      | 0.91 |
| UBN2      | 0.91 |
| SYCE1L    | 0.91 |
| BTBD19    | 0.91 |
| SLC6A8    | 0.91 |
| NF1       | 0.90 |
| CLN8      | 0.90 |



|            |       |
|------------|-------|
| EZH2       | -1.47 |
| BARD1      | -1.46 |
| AC080038.1 | -1.44 |
| RPGR       | -1.44 |
| C14orf119  | -1.44 |
| ABL1       | -1.44 |
| UBE2S      | -1.43 |
| RMDN1      | -1.43 |
| SLC52A2    | -1.43 |
| RNF220     | -1.43 |
| PLCB3      | -1.42 |
| ELOVL6     | -1.42 |
| DOLPP1     | -1.41 |
| STEAP3     | -1.41 |
| FANCI      | -1.41 |
| PPM1F      | -1.41 |
| ECI2       | -1.41 |
| LMNB2      | -1.40 |
| VAMP2      | -1.40 |
| ZNF467     | -1.39 |
| TRIM59     | -1.39 |
| TONSL      | -1.39 |
| MKRN1      | -1.39 |
| MYBL1      | -1.39 |
| AFAP1      | -1.38 |
| EPAS1      | -1.38 |
| CHTF18     | -1.38 |
| C12orf75   | -1.37 |
| PARP1      | -1.37 |
| ARL4D      | -1.36 |
| ANKRD18B   | -1.36 |
| TTL        | -1.35 |
| CACNB3     | -1.35 |
| PPP1CA     | -1.35 |
| NAPRT      | -1.35 |
| SYT11      | -1.35 |
| PLAUR      | -1.35 |
| GLIPR2     | -1.35 |
| DPCD       | -1.34 |
| SYTL4      | -1.34 |
| NFIC       | -1.34 |
| POC1B      | -1.34 |
| HIC1       | -1.34 |
| CTSO       | -1.34 |
| MCM5       | -1.34 |

|          |      |
|----------|------|
| PAFAH2   | 0.90 |
| TMED5    | 0.90 |
| ATP7B    | 0.90 |
| KRT18    | 0.90 |
| SACM1L   | 0.89 |
| THAP6    | 0.89 |
| TMTC3    | 0.89 |
| ZBTB43   | 0.89 |
| ARSD     | 0.89 |
| TESK2    | 0.89 |
| VWA8     | 0.89 |
| SLC25A4  | 0.89 |
| CPT2     | 0.89 |
| GYPE     | 0.89 |
| PPP1R13L | 0.88 |
| SLC35F5  | 0.88 |
| MSRB2    | 0.88 |
| STK4     | 0.88 |
| ASAP2    | 0.87 |
| TEAD1    | 0.87 |
| MICA     | 0.87 |
| HTATIP2  | 0.87 |
| PAQR7    | 0.87 |
| SLC20A2  | 0.87 |
| SC5D     | 0.86 |
| TEK      | 0.86 |
| PUDP     | 0.86 |
| TDRP     | 0.85 |
| COA5     | 0.85 |
| ZNF43    | 0.85 |
| SESN2    | 0.85 |
| APPL2    | 0.85 |
| MCFD2    | 0.85 |
| OTUD4    | 0.85 |
| DCUN1D1  | 0.85 |
| CCPG1    | 0.85 |
| MIGA1    | 0.84 |
| MT-TP    | 0.84 |
| ADARB1   | 0.84 |
| ASPH     | 0.84 |
| TMEM132A | 0.84 |
| EXOSC5   | 0.84 |
| ECE2     | 0.84 |
| CCNDBP1  | 0.84 |
| ADGRL4   | 0.84 |

|          |       |
|----------|-------|
| CD99L2   | -1.34 |
| RNASEH2A | -1.34 |
| RAC2     | -1.34 |
| RFC4     | -1.33 |
| POLD3    | -1.33 |
| LHFPL2   | -1.33 |
| ATP6V1B2 | -1.33 |
| RUSC1    | -1.33 |
| ARFGAP2  | -1.32 |
| NCAPH2   | -1.31 |
| CDCA7L   | -1.31 |
| DSN1     | -1.31 |
| TMEM161A | -1.30 |
| RMI2     | -1.30 |
| SLC35E2B | -1.30 |
| CCDC18   | -1.30 |
| CALM3    | -1.29 |
| PCSK7    | -1.29 |
| FAM89B   | -1.29 |
| SNRPA    | -1.29 |
| SCLT1    | -1.29 |
| PPP1R14B | -1.29 |
| GMPPB    | -1.29 |
| C17orf53 | -1.28 |
| SSR1     | -1.28 |
| GPR176   | -1.28 |
| NPM3     | -1.28 |
| STK38    | -1.28 |
| MECOM    | -1.28 |
| DYNLL2   | -1.28 |
| IL17RA   | -1.28 |
| DNA2     | -1.27 |
| CDC25B   | -1.27 |
| THOC6    | -1.27 |
| PFAS     | -1.27 |
| BCL3     | -1.27 |
| PIF1     | -1.27 |
| NIPAL3   | -1.27 |
| KLF13    | -1.27 |
| STK17B   | -1.27 |
| ANXA6    | -1.26 |
| ADCY7    | -1.26 |
| MTHFD1   | -1.26 |
| NBEAL2   | -1.26 |
| TIMM44   | -1.26 |

|          |      |
|----------|------|
| GDE1     | 0.84 |
| SIL1     | 0.84 |
| HIPK3    | 0.83 |
| NEK3     | 0.83 |
| PDGFA    | 0.83 |
| CCNJ     | 0.83 |
| IMMP2L   | 0.83 |
| GNB4     | 0.83 |
| CARD8    | 0.82 |
| RSPH3    | 0.82 |
| EFNA1    | 0.82 |
| RAB5A    | 0.82 |
| CNEP1R1  | 0.82 |
| SUMF1    | 0.82 |
| LIPA     | 0.82 |
| MFSD8    | 0.82 |
| NT5C2    | 0.81 |
| PIGP     | 0.81 |
| AVL9     | 0.81 |
| RALGAPA1 | 0.81 |
| SLC35D1  | 0.80 |
| MLH3     | 0.80 |
| TMEM63B  | 0.80 |
| CDKN1B   | 0.80 |
| CYB5R1   | 0.80 |
| CHCHD10  | 0.80 |
| XPC      | 0.80 |
| ORAI3    | 0.79 |
| FKBP4    | 0.79 |
| KRT8     | 0.79 |
| MFAP3    | 0.79 |
| ABHD4    | 0.79 |
| PEX5     | 0.79 |
| KLC2     | 0.78 |
| ENTPD4   | 0.78 |
| B9D1     | 0.78 |
| CCDC28A  | 0.78 |
| CCNT2    | 0.78 |
| M6PR     | 0.78 |
| TSC22D2  | 0.78 |
| ATAD1    | 0.78 |
| KDSR     | 0.78 |
| ATPAF1   | 0.78 |
| ABCC1    | 0.77 |
| RNF170   | 0.77 |

|          |       |
|----------|-------|
| MAP3K12  | -1.25 |
| SGSH     | -1.25 |
| TP53I13  | -1.25 |
| DBF4B    | -1.25 |
| MARVELD2 | -1.25 |
| RAB27A   | -1.24 |
| TMCO3    | -1.24 |
| C19orf71 | -1.24 |
| SIPA1L1  | -1.24 |
| APOOL    | -1.23 |
| DNMT1    | -1.23 |
| MARVELD1 | -1.22 |
| A1BG     | -1.22 |
| USP1     | -1.22 |
| FEN1     | -1.22 |
| RAB3B    | -1.22 |
| SERPINH1 | -1.22 |
| CMTM3    | -1.22 |
| NCBP3    | -1.22 |
| MMP19    | -1.22 |
| PMM1     | -1.22 |
| PSKH1    | -1.22 |
| EPS8L1   | -1.22 |
| CLCF1    | -1.22 |
| DNAJC9   | -1.22 |
| RELT     | -1.22 |
| AP3B1    | -1.22 |
| EFNB2    | -1.21 |
| TMEM106C | -1.21 |
| INSIG1   | -1.21 |
| MAP3K5   | -1.21 |
| GALNT15  | -1.21 |
| RAPH1    | -1.21 |
| WDR34    | -1.20 |
| PDCD1LG2 | -1.20 |
| POTEF    | -1.20 |
| TLNRD1   | -1.19 |
| ILF3-DT  | -1.19 |
| MADD     | -1.19 |
| TRMT112  | -1.19 |
| NAMPTP1  | -1.19 |
| ZNF512   | -1.19 |
| RCC1L    | -1.19 |
| CHN1     | -1.19 |
| UBXN2B   | -1.18 |

|          |      |
|----------|------|
| NDFIP2   | 0.77 |
| RB1CC1   | 0.77 |
| UTP25    | 0.76 |
| ZCCHC14  | 0.76 |
| CRBN     | 0.76 |
| RGL2     | 0.76 |
| NRROS    | 0.76 |
| PLCL2    | 0.76 |
| GNPTG    | 0.76 |
| KDM3A    | 0.76 |
| CRADD    | 0.76 |
| XKR8     | 0.76 |
| KCTD11   | 0.75 |
| FKTN     | 0.75 |
| PHLPP2   | 0.75 |
| SMIM20   | 0.75 |
| CYBRD1   | 0.75 |
| PCNX4    | 0.75 |
| KCTD20   | 0.75 |
| VTA1     | 0.75 |
| DNAJC16  | 0.75 |
| NBR1     | 0.74 |
| MINPP1   | 0.74 |
| GLO1     | 0.74 |
| FBXL20   | 0.74 |
| DNAJB9   | 0.74 |
| KLC4     | 0.74 |
| DAGLA    | 0.74 |
| ESAM     | 0.74 |
| KIF3B    | 0.74 |
| TPRG1L   | 0.73 |
| VPS4B    | 0.73 |
| NCSTN    | 0.73 |
| BSDC1    | 0.72 |
| EFR3A    | 0.72 |
| SYS1     | 0.72 |
| TMEM59   | 0.72 |
| CHST12   | 0.72 |
| MAN1A2   | 0.72 |
| GOLGA2   | 0.71 |
| MOCS3    | 0.71 |
| SLC9A1   | 0.71 |
| TRMT6    | 0.71 |
| ACVR1B   | 0.71 |
| ATP6V1G1 | 0.71 |

|          |       |
|----------|-------|
| LRP8     | -1.18 |
| CENPJ    | -1.18 |
| MCUB     | -1.18 |
| PNPO     | -1.18 |
| MICAL2   | -1.18 |
| MICAL2   | -1.18 |
| MAP3K6   | -1.18 |
| FAM53B   | -1.16 |
| ECH1     | -1.16 |
| SFRP1    | -1.16 |
| ARPC4    | -1.16 |
| FAAP100  | -1.16 |
| ARHGDI1A | -1.16 |
| PRKD1    | -1.16 |
| GIMAP7   | -1.16 |
| SBF1     | -1.15 |
| NCAPD3   | -1.15 |
| CALU     | -1.15 |
| ZNF785   | -1.15 |
| NME3     | -1.15 |
| ADGRA2   | -1.15 |
| RNF24    | -1.15 |
| PIGC     | -1.15 |
| SLC25A22 | -1.15 |
| TYMP     | -1.15 |
| POLD1    | -1.14 |
| FAM171A2 | -1.14 |
| VARS     | -1.14 |
| NAMPT    | -1.14 |
| PTGES2   | -1.14 |
| DAXX     | -1.14 |
| DHRS4    | -1.13 |
| CBX6     | -1.13 |
| DNAJC5   | -1.13 |
| NUDT3    | -1.12 |
| MLXIP    | -1.12 |
| NME4     | -1.12 |
| LPCAT1   | -1.12 |
| SUPT6H   | -1.11 |
| SESTD1   | -1.11 |
| KDM1A    | -1.11 |
| LRFN3    | -1.11 |
| SFT2D1   | -1.11 |
| CRNDE    | -1.11 |
| HPSE     | -1.11 |

|          |      |
|----------|------|
| TMX2     | 0.71 |
| PTPN4    | 0.71 |
| NECAP1   | 0.70 |
| YTHDF3   | 0.70 |
| TMEM106B | 0.70 |
| SYNJ1    | 0.70 |
| SLC30A6  | 0.70 |
| LRRC75A  | 0.70 |
| RPS6KC1  | 0.70 |
| LIMD1    | 0.69 |
| SERTAD1  | 0.69 |
| POLD4    | 0.69 |
| WLS      | 0.69 |
| CYTH3    | 0.69 |
| PRUNE2   | 0.69 |
| JMY      | 0.68 |
| TRAM2    | 0.68 |
| RUFY3    | 0.68 |
| ZNF800   | 0.68 |
| SMIM13   | 0.68 |
| ATP7A    | 0.68 |
| ERGIC2   | 0.68 |
| ERLIN2   | 0.67 |
| NHLRC2   | 0.67 |
| MIA3     | 0.67 |
| DYRK1B   | 0.66 |
| NMRK1    | 0.66 |
| GAA      | 0.66 |
| CBWD2    | 0.66 |
| ZNF268   | 0.66 |
| IFNAR1   | 0.65 |
| PELO     | 0.65 |
| C1GALT1  | 0.65 |
| STMP1    | 0.65 |
| DNAL1    | 0.65 |
| ICAM2    | 0.65 |
| ANKIB1   | 0.65 |
| SUN1     | 0.64 |
| MRRF     | 0.64 |
| DNAJB12  | 0.64 |
| TCAIM    | 0.64 |
| PIAS2    | 0.64 |
| EIF4G3   | 0.64 |
| LEMD2    | 0.64 |
| UNC50    | 0.64 |

|            |       |
|------------|-------|
| WDR54      | -1.10 |
| MAP3K13    | -1.10 |
| CCR10      | -1.10 |
| REPIN1     | -1.10 |
| ENO2       | -1.10 |
| NCKIPSD    | -1.10 |
| INTS9      | -1.10 |
| DHRS4L2    | -1.10 |
| PYCR3      | -1.10 |
| PLP2       | -1.10 |
| MVK        | -1.09 |
| SUFU       | -1.09 |
| ARL6IP1    | -1.09 |
| ODC1       | -1.09 |
| DAZAP1     | -1.08 |
| CHST7      | -1.08 |
| C15orf61   | -1.08 |
| TTL12      | -1.08 |
| STARD10    | -1.08 |
| LRBA       | -1.08 |
| CCDC71L    | -1.07 |
| ZNF48      | -1.07 |
| GLUL       | -1.07 |
| RCAN1      | -1.07 |
| TAGLN2     | -1.07 |
| ARPIN      | -1.07 |
| SLC37A4    | -1.07 |
| NAXD       | -1.07 |
| MYDGF      | -1.07 |
| MFAP2      | -1.07 |
| FANCG      | -1.07 |
| PRPS2      | -1.07 |
| NRM        | -1.06 |
| CTSC       | -1.06 |
| MEX3A      | -1.06 |
| AP001505.1 | -1.06 |
| TNPO1      | -1.06 |
| SLC39A3    | -1.06 |
| FSTL3      | -1.06 |
| BNC1       | -1.06 |
| GPR161     | -1.06 |
| ZNF746     | -1.06 |
| AP2S1      | -1.06 |
| RANBP1     | -1.06 |
| PITPNA     | -1.06 |

|          |      |
|----------|------|
| MBTPS2   | 0.64 |
| SLFN12   | 0.64 |
| RTCA     | 0.63 |
| RBM18    | 0.63 |
| SETD7    | 0.63 |
| STX17    | 0.63 |
| CDYL     | 0.63 |
| RHOBTB3  | 0.63 |
| PRMT3    | 0.63 |
| ANXA3    | 0.63 |
| CMPK1    | 0.63 |
| ADAM17   | 0.62 |
| ERCC1    | 0.62 |
| SERINC3  | 0.62 |
| RIT1     | 0.62 |
| PLXNB1   | 0.62 |
| CPPED1   | 0.62 |
| SLC7A6   | 0.62 |
| ERCC5    | 0.62 |
| ERCC5    | 0.62 |
| UBE3B    | 0.62 |
| PPM1A    | 0.61 |
| C6orf120 | 0.61 |
| DDX1     | 0.61 |
| ERCC4    | 0.60 |
| TKFC     | 0.60 |
| FAM214B  | 0.60 |
| CHMP5    | 0.60 |
| PCAT19   | 0.60 |
| TMEM9    | 0.59 |
| PPP1R15B | 0.59 |
| RNF6     | 0.59 |
| RHOQ     | 0.59 |
| SHTN1    | 0.59 |
| BAK1     | 0.59 |
| NDUFB5   | 0.59 |
| CNOT6    | 0.59 |
| LDB1     | 0.59 |
| MOSPD2   | 0.59 |
| UBE2H    | 0.59 |
| ATP6V1D  | 0.59 |
| LZIC     | 0.58 |
| EMC7     | 0.58 |
| HSD17B12 | 0.58 |
| SNAPC5   | 0.58 |

|            |       |
|------------|-------|
| FZD1       | -1.06 |
| ACOT8      | -1.05 |
| C11orf95   | -1.05 |
| VMA21      | -1.05 |
| FECH       | -1.05 |
| PTMS       | -1.05 |
| UBR7       | -1.05 |
| AC092171.2 | -1.04 |
| AP1M1      | -1.04 |
| HNRNPD     | -1.04 |
| THOC3      | -1.04 |
| WASF3      | -1.04 |
| SRSF2      | -1.04 |
| JKAMP      | -1.04 |
| EXTL3      | -1.03 |
| TOMM34     | -1.03 |
| DGCR2      | -1.03 |
| ZNF205     | -1.03 |
| NYAP1      | -1.03 |
| TRAPPC9    | -1.03 |
| SAMD10     | -1.02 |
| LINC00987  | -1.02 |
| TTLL11     | -1.02 |
| AGPAT2     | -1.02 |
| EIF2AK1    | -1.02 |
| ALDH16A1   | -1.01 |
| CNOT9      | -1.01 |
| EIF4EBP1   | -1.01 |
| NSD2       | -1.01 |
| RBFOX2     | -1.01 |
| ERI1       | -1.01 |
| CEP89      | -1.01 |
| SLC45A3    | -1.01 |
| ASL        | -1.00 |
| SEMA6B     | -1.00 |
| HAUS2      | -1.00 |
| PDE4DIP    | -1.00 |
| TACC1      | -1.00 |
| ALDH9A1    | -1.00 |
| LRFN4      | -0.99 |
| RTL8C      | -0.99 |
| CORO1C     | -0.99 |
| MVD        | -0.99 |
| FBXL18     | -0.98 |
| SMC4       | -0.98 |

|            |      |
|------------|------|
| CHMP1B     | 0.58 |
| CRY2       | 0.58 |
| SPR        | 0.58 |
| MICB       | 0.58 |
| IGF2BP3    | 0.57 |
| APH1B      | 0.57 |
| NEK6       | 0.57 |
| ZMAT3      | 0.57 |
| SWI5       | 0.57 |
| NAPG       | 0.57 |
| GGA1       | 0.57 |
| AHR        | 0.57 |
| GID4       | 0.56 |
| NR1D2      | 0.56 |
| PDZD8      | 0.56 |
| PIK3R3     | 0.56 |
| CTR9       | 0.56 |
| GMFG       | 0.56 |
| TTC19      | 0.56 |
| GTF3C3     | 0.56 |
| GOLGA4     | 0.56 |
| SEN2       | 0.55 |
| MGME1      | 0.55 |
| FXR1       | 0.55 |
| OCIAD1     | 0.55 |
| AC010618.1 | 0.54 |
| CLN5       | 0.54 |
| SIRT2      | 0.54 |
| POFUT1     | 0.54 |
| SRA1       | 0.54 |
| TMEM167B   | 0.54 |
| SPPL2A     | 0.54 |
| SCD5       | 0.53 |
| GIPC1      | 0.53 |
| ANAPC13    | 0.53 |
| FHL3       | 0.53 |
| CERS2      | 0.53 |
| HDAC1      | 0.53 |
| TMEM9B     | 0.53 |
| RARS2      | 0.52 |
| RDH14      | 0.52 |
| RTL10      | 0.52 |
| TAX1BP1    | 0.52 |
| NTPCR      | 0.52 |
| TBCK       | 0.52 |

|            |       |
|------------|-------|
| C16orf45   | -0.98 |
| TPRN       | -0.98 |
| EGLN2      | -0.98 |
| PSEN2      | -0.97 |
| SAP30BP    | -0.97 |
| AP3S2      | -0.97 |
| UBAC1      | -0.97 |
| PRUNE1     | -0.97 |
| FARSA      | -0.96 |
| TXNDC15    | -0.96 |
| NDUFA9     | -0.96 |
| AC080112.1 | -0.96 |
| BLOC1S4    | -0.96 |
| SLC12A7    | -0.96 |
| TSPAN14    | -0.96 |
| KCTD12     | -0.96 |
| ARHGAP22   | -0.95 |
| FOXK1      | -0.95 |
| WTAP       | -0.95 |
| EXOSC6     | -0.95 |
| PAXX       | -0.95 |
| INTS13     | -0.95 |
| CNNM4      | -0.95 |
| TMEM104    | -0.95 |
| GOLM1      | -0.95 |
| NDST1      | -0.95 |
| DFFA       | -0.94 |
| CDK2       | -0.94 |
| MIS18BP1   | -0.94 |
| RNF126     | -0.94 |
| MACROD1    | -0.94 |
| ADIPOR1    | -0.94 |
| LLGL1      | -0.94 |
| FAM126A    | -0.94 |
| ADH5       | -0.93 |
| KIF3C      | -0.93 |
| SURF4      | -0.93 |
| RHOT2      | -0.93 |
| G6PD       | -0.93 |
| VAT1       | -0.93 |
| TBC1D16    | -0.93 |
| UBFD1      | -0.93 |
| FOXP1      | -0.93 |
| BOP1.00    | -0.92 |
| NIPA2      | -0.92 |

|         |      |
|---------|------|
| MTMR3   | 0.52 |
| HEG1    | 0.50 |
| MAP2K4  | 0.50 |
| MTMR9   | 0.50 |
| PDHX    | 0.50 |
| CAPN7   | 0.50 |
| TRPC4AP | 0.49 |
| CSNK1G3 | 0.48 |
| TM9SF4  | 0.48 |
| IARS2   | 0.48 |
| SNX11   | 0.48 |
| HBP1    | 0.47 |
| PCNP    | 0.46 |
| ANKRD40 | 0.46 |
| TCEA1   | 0.45 |
| SS18    | 0.45 |
| CHFR    | 0.44 |

|          |       |
|----------|-------|
| FAM234A  | -0.92 |
| STARD7   | -0.92 |
| NCOA7    | -0.92 |
| RAB8B    | -0.92 |
| PARVA    | -0.92 |
| WRAP53   | -0.92 |
| SH3PXD2B | -0.91 |
| TRABD    | -0.91 |
| RBM10    | -0.91 |
| ICMT     | -0.91 |
| MEX3D    | -0.91 |
| TOR3A    | -0.91 |
| H2AFV    | -0.91 |
| MRPS12   | -0.90 |
| TCEAL3   | -0.90 |
| UNKL     | -0.90 |
| CIAO3    | -0.90 |
| ARF5     | -0.89 |
| ATP6V1A  | -0.89 |
| CCDC88A  | -0.89 |
| PLPP3    | -0.89 |
| BCAT2    | -0.89 |
| SUMO3    | -0.88 |
| DTYMK    | -0.88 |
| TRIM65   | -0.88 |
| ANKRD9   | -0.88 |
| STOML1   | -0.88 |
| INPP5F   | -0.88 |
| NR2F2    | -0.88 |
| MAP3K1   | -0.88 |
| ZFP36L1  | -0.88 |
| NUMBL    | -0.87 |
| EML3     | -0.87 |
| MGST1    | -0.87 |
| SMAD3    | -0.87 |
| BAZ1A    | -0.87 |
| MSRB1    | -0.87 |
| TPM4     | -0.87 |
| FAR2     | -0.86 |
| POLR3H   | -0.86 |
| TMCC3    | -0.86 |
| FAM120A  | -0.86 |
| TTYH3    | -0.86 |
| B3GNT2   | -0.86 |
| PGAM1    | -0.85 |



|            |       |
|------------|-------|
| NARF       | -0.85 |
| RBMX2      | -0.85 |
| SPATA2L    | -0.85 |
| CNTNAP1    | -0.85 |
| CXXC1      | -0.85 |
| SEC62      | -0.85 |
| ARL10.00   | -0.85 |
| YME1L1     | -0.85 |
| KDELC2     | -0.84 |
| PPP3CC     | -0.84 |
| MCM3       | -0.84 |
| FPGS       | -0.84 |
| CNTLN      | -0.84 |
| ZBED1      | -0.84 |
| KLHL42     | -0.84 |
| RASIP1     | -0.83 |
| DCAF7      | -0.83 |
| ACOT7      | -0.83 |
| TBC1D14    | -0.83 |
| CEP78      | -0.83 |
| ZDHHC7     | -0.83 |
| PIAS4      | -0.83 |
| NABP2      | -0.83 |
| SPECC1L    | -0.83 |
| IER5       | -0.83 |
| SNHG9      | -0.83 |
| AP1B1      | -0.82 |
| LARP4B     | -0.82 |
| MIEF1      | -0.82 |
| HDHD5      | -0.82 |
| ACLY       | -0.82 |
| AL162171.1 | -0.82 |
| EVA1C      | -0.82 |
| SMAP2      | -0.81 |
| CHTF8      | -0.81 |
| CHTF8      | -0.81 |
| PRXL2B     | -0.81 |
| UGDH       | -0.81 |
| GAB2       | -0.81 |
| PCYT2      | -0.81 |
| SEP9       | -0.81 |
| ANKFY1     | -0.80 |
| AKTIP      | -0.80 |
| MAPKAPK2   | -0.80 |
| PUF60      | -0.80 |

|          |       |
|----------|-------|
| ALDH1B1  | -0.80 |
| UBTD2    | -0.80 |
| ALMS1    | -0.80 |
| TMEM260  | -0.80 |
| ASF1A    | -0.80 |
| BCL6     | -0.80 |
| ZNF512B  | -0.79 |
| TAL1     | -0.79 |
| ZYX      | -0.79 |
| DNAJC10  | -0.79 |
| SLC2A4RG | -0.79 |
| DOCK9    | -0.79 |
| SHQ1     | -0.79 |
| SSRP1    | -0.79 |
| VMP1     | -0.79 |
| PKD1     | -0.79 |
| KLHL5    | -0.79 |
| NCDN     | -0.78 |
| SGF29    | -0.78 |
| PQLC1    | -0.78 |
| ZZEF1    | -0.78 |
| STK25    | -0.78 |
| GFOD1    | -0.78 |
| KIAA0586 | -0.78 |
| PXN      | -0.77 |
| ANP32E   | -0.77 |
| LRRC8A   | -0.77 |
| GTF2IRD1 | -0.77 |
| FAM129B  | -0.77 |
| CTU2     | -0.77 |
| POP7     | -0.77 |
| AKAP1    | -0.77 |
| ARMC6    | -0.76 |
| AAAS     | -0.76 |
| RILPL2   | -0.76 |
| BLOC1S3  | -0.76 |
| TNK2     | -0.76 |
| ZNF775   | -0.76 |
| USP22    | -0.76 |
| ACTR2    | -0.76 |
| RCN3     | -0.75 |
| POLDIP2  | -0.75 |
| DBR1     | -0.75 |
| USP19    | -0.75 |
| RTL8B    | -0.75 |

|          |       |
|----------|-------|
| ABCC10   | -0.75 |
| JMJD8    | -0.75 |
| ADAMTSL1 | -0.74 |
| TCTA     | -0.74 |
| PRR14    | -0.74 |
| LSM14A   | -0.74 |
| BCS1L    | -0.74 |
| SGTA     | -0.74 |
| RTL8A    | -0.74 |
| ZBTB45   | -0.74 |
| MAPK14   | -0.74 |
| TRAFD1   | -0.74 |
| TIGD5    | -0.74 |
| ZBTB47   | -0.74 |
| MGAT4B   | -0.73 |
| GRB10    | -0.73 |
| EIF2B5   | -0.73 |
| LHFPL6   | -0.73 |
| EIF4H    | -0.73 |
| CCM2     | -0.73 |
| SLC22A23 | -0.73 |
| ORAI2    | -0.73 |
| NAV2     | -0.73 |
| PIGS     | -0.73 |
| PRR12    | -0.72 |
| NGRN     | -0.72 |
| ZNF330   | -0.72 |
| SLC16A1  | -0.72 |
| SH3TC1   | -0.72 |
| CAVIN1   | -0.72 |
| CSNK1G2  | -0.72 |
| STMN1    | -0.72 |
| C8orf33  | -0.72 |
| SLC39A13 | -0.72 |
| WIPI2    | -0.72 |
| KLF16    | -0.71 |
| ST3GAL2  | -0.71 |
| SNX8     | -0.71 |
| TOR4A    | -0.71 |
| PJA1     | -0.71 |
| DHX37    | -0.71 |
| UBE2I    | -0.71 |
| DTD1     | -0.71 |
| SQOR     | -0.71 |
| FADD     | -0.71 |

|            |       |
|------------|-------|
| MARK3      | -0.71 |
| DPH7       | -0.70 |
| TSPYL1     | -0.70 |
| MAP4K5     | -0.70 |
| ALYREF     | -0.70 |
| CTDSP2     | -0.70 |
| NDE1       | -0.70 |
| TTC38      | -0.70 |
| VPS37C     | -0.70 |
| GRB2       | -0.70 |
| RCOR1      | -0.70 |
| CCNG2      | -0.70 |
| FP565260.2 | -0.70 |
| CELF1      | -0.70 |
| MLST8      | -0.70 |
| C19orf54   | -0.70 |
| MAP4       | -0.70 |
| TULP3      | -0.70 |
| BAZ1B      | -0.70 |
| SLC29A1    | -0.70 |
| CARS2      | -0.69 |
| CACNA2D1   | -0.69 |
| NCLN       | -0.69 |
| TPGS2      | -0.69 |
| PAPSS1     | -0.69 |
| TCF20      | -0.69 |
| AXIN1      | -0.68 |
| SMC1A      | -0.68 |
| IP6K1      | -0.68 |
| MKRN2      | -0.68 |
| ZNF428     | -0.68 |
| FBXO46     | -0.68 |
| MAD2L1BP   | -0.68 |
| LRRC47     | -0.68 |
| CNRIP1     | -0.68 |
| GPD2       | -0.68 |
| TOP3A      | -0.68 |
| RUBCN      | -0.68 |
| DCAKD      | -0.67 |
| POLRMT     | -0.67 |
| FZR1       | -0.67 |
| SART1      | -0.67 |
| MED16      | -0.67 |
| CSNK1G1    | -0.67 |
| WDTC1      | -0.67 |

|          |       |
|----------|-------|
| TCF7L1   | -0.66 |
| CANT1    | -0.66 |
| CPT1A    | -0.66 |
| CLUH     | -0.66 |
| GRK6     | -0.66 |
| DIP2B    | -0.66 |
| SLC10A3  | -0.66 |
| PKM      | -0.65 |
| TOPBP1   | -0.65 |
| FBXO31   | -0.65 |
| NES      | -0.65 |
| BAHCC1   | -0.65 |
| MAP4K4   | -0.64 |
| CAD      | -0.64 |
| TIMM50   | -0.64 |
| ARHGAP35 | -0.64 |
| TUBB6    | -0.64 |
| DDAH2    | -0.64 |
| PTTG1IP  | -0.63 |
| SSU72    | -0.63 |
| DPM3     | -0.63 |
| ZNF74    | -0.63 |
| PISD     | -0.63 |
| SLC25A39 | -0.63 |
| MAFG     | -0.63 |
| TRIM3    | -0.63 |
| HDAC6    | -0.63 |
| PRMT2    | -0.62 |
| CHST2    | -0.62 |
| ATN1     | -0.62 |
| RALY     | -0.62 |
| CHID1    | -0.62 |
| NPLOC4   | -0.62 |
| SLC25A11 | -0.62 |
| ARL4A    | -0.62 |
| BRD4     | -0.62 |
| NLGN2    | -0.62 |
| SPOUT1   | -0.62 |
| CMAS     | -0.61 |
| GRK2     | -0.61 |
| SLC35A4  | -0.61 |
| FBXO7    | -0.61 |
| SIPA1    | -0.61 |
| MTDH     | -0.61 |
| NELFB    | -0.60 |

|          |       |
|----------|-------|
| CCDC124  | -0.60 |
| CREB3L2  | -0.60 |
| PPP4C    | -0.60 |
| RSPRY1   | -0.60 |
| POM121   | -0.60 |
| CHERP    | -0.60 |
| CRKL     | -0.60 |
| MRPL28   | -0.59 |
| IDH1     | -0.59 |
| GIMAP5   | -0.59 |
| STRN4    | -0.59 |
| PHB      | -0.59 |
| PIGQ     | -0.59 |
| MECP2    | -0.59 |
| ZMIZ2    | -0.59 |
| SF3A3    | -0.59 |
| SERPINB9 | -0.59 |
| RNF19B   | -0.58 |
| RPA1     | -0.58 |
| DCTPP1   | -0.58 |
| DBNL     | -0.58 |
| WDR45B   | -0.58 |
| GTPBP1   | -0.57 |
| LMF2     | -0.57 |
| CYBA     | -0.57 |
| COPS7B   | -0.57 |
| DIAPH1   | -0.57 |
| BRK1     | -0.57 |
| UPF1     | -0.57 |
| CTBP1    | -0.57 |
| RHOG     | -0.56 |
| SH3RF3   | -0.56 |
| NDUFV1   | -0.56 |
| YWHAQ    | -0.56 |
| UBL4A    | -0.56 |
| SHISA5   | -0.56 |
| TCF3     | -0.56 |
| ANP32A   | -0.56 |
| ZBTB1    | -0.55 |
| OGFOD3   | -0.55 |
| SAFB2    | -0.55 |
| GIMAP8   | -0.55 |
| WDR6     | -0.55 |
| BTBD2    | -0.55 |
| IVNS1ABP | -0.55 |

|          |       |
|----------|-------|
| MUS81    | -0.55 |
| B3GALNT2 | -0.54 |
| LRCH3    | -0.54 |
| MCRIP1   | -0.54 |
| GRWD1    | -0.54 |
| RNH1     | -0.54 |
| SNAP47   | -0.54 |
| ARID1B   | -0.54 |
| ARMC5    | -0.53 |
| RNF34    | -0.53 |
| ABCB8    | -0.53 |
| ACO2     | -0.53 |
| PSMD5    | -0.52 |
| EXD2     | -0.52 |
| MON1B    | -0.52 |
| ZFYVE1   | -0.51 |
| NNT      | -0.51 |
| YY1AP1   | -0.51 |
| SEC22C   | -0.50 |
| DLST     | -0.49 |
| ASXL1    | -0.49 |
| RAP2B    | -0.48 |
| SNX1     | -0.48 |
| RSU1     | -0.48 |
| NUBP2    | -0.48 |
| ASB6     | -0.47 |
| RER1     | -0.47 |
| LETM1    | -0.47 |
| USF1     | -0.46 |
| CHMP7    | -0.45 |
| PPP2R1A  | -0.45 |
| ATXN7L3  | -0.45 |
| PCNX3    | -0.44 |
| RAB35    | -0.44 |

**Supplement Table III. Genes that show significant expression change by TNF-a**

| Gene Names | Down (log <sub>2</sub> (FC)) | Gene Names | Up (log <sub>2</sub> (FC)) |
|------------|------------------------------|------------|----------------------------|
| CCL1       | -3.18                        | U2AF1      | 1.34                       |
| FOXF1      | -1.72                        | BEST1      | 1.30                       |
| WHRN       | -1.39                        | CXCL11     | 1.08                       |
| FAAH       | -1.05                        | AC007383.2 | 0.97                       |
| SPATA13    | -1.01                        | FBXO41     | 0.87                       |
| ZNF443     | -0.94                        | LINC00513  | 0.83                       |
| TYW1B      | -0.80                        | TRAF1      | 0.81                       |
| ZNF433     | -0.78                        | CEACAM16   | 0.74                       |
| ZNF230     | -0.73                        | Sept1      | 0.68                       |
| IQCA1      | -0.72                        | GAL3ST4    | 0.63                       |
| ZNF684     | -0.69                        | PCDHB8     | 0.62                       |
| AMOT       | -0.64                        | LDLRAD2    | 0.61                       |
| ZNF624     | -0.54                        | MIR126     | 0.58                       |
| AC103746.1 | -0.52                        | AC006001.3 | 0.56                       |
| SCUBE2     | -0.46                        | SPTBN5     | 0.55                       |
| TBC1D19    | -0.45                        | MIR222HG   | 0.52                       |
| WDSUB1     | -0.45                        | NEAT1      | 0.52                       |
| CBR4       | -0.37                        | DPF3       | 0.52                       |
| SOCS5      | -0.34                        | KIF16B     | 0.47                       |
| RHOA       | -0.33                        | GOLGA8A    | 0.46                       |
| AC026785.2 | -0.32                        | GABRE      | 0.43                       |
| BBS9       | -0.27                        | SMN2       | 0.40                       |
| LMBRD1     | -0.25                        | LINC00346  | 0.40                       |
| TMEM87A    | -0.24                        | NPIP4      | 0.39                       |
| ELF1       | -0.23                        | KCTD13     | 0.39                       |
| ASB8       | -0.23                        | RABGEF1    | 0.36                       |
| VPS37A     | -0.21                        | COL27A1    | 0.33                       |
|            |                              | BTBD19     | 0.33                       |
|            |                              | CBWD5      | 0.31                       |
|            |                              | MYEF2      | 0.30                       |
|            |                              | EP400P1    | 0.28                       |
|            |                              | MIR22HG    | 0.26                       |
|            |                              | HIP1R      | 0.26                       |
|            |                              | DNAJC11    | 0.24                       |
|            |                              | PNN        | 0.23                       |
|            |                              | CFLAR      | 0.20                       |



**Supplemental Table IV. Changes of Intercellular adhesion molecules by septin 2 KD**

| Gene name  | log2 (FC) | negative log10 (adj.P.Value) |
|------------|-----------|------------------------------|
| CDH5 **    | 1.26      | 1.8                          |
| CTNNB1     | 0.91      | 1.12                         |
| CTNNA1     | 0.13      | 0.23                         |
| CTNND1     | 0.02      | 0.02                         |
| NECTIN1    | 0.43      | 0.42                         |
| NECTIN2 ** | 0.27      | 0.59                         |
| NECTIN3    | -0.08     | 0.07                         |
| AFDN **    | 0.00      | 0                            |
| PECAM1 **  | 0.68      | 0.91                         |
| TJP1 **    | 0.09      | 0.07                         |
| TJP2       | 0.24      | 0.34                         |
| OCLN       | -0.28     | 0.12                         |
| CLDN1      | -0.92     | 0.7                          |
| CLDN3      | 3.04      | 1.51                         |
| CLDN4      | 1.10      | 0.72                         |
| CLDN5      | 0.54      | 0.21                         |
| CLDN7      | -1.61     | 1.37                         |
| CLDN10     | -4.66     | 0.89                         |
| CLDN11     | -0.29     | 0.12                         |
| CLDN12     | 0.38      | 0.51                         |
| CLDN14     | 0.96      | 0.87                         |
| CLDN15     | 0.14      | 0.1                          |
| JAM3       | 0.63      | 0.78                         |
| CD99       | -0.35     | 0.73                         |
| ACTB       | -0.76     | 0.88                         |
| ACTA1      | -0.79     | 0.57                         |
| ACTA2      | 1.03      | 1.18                         |
| ACTG1      | -0.20     | 0.18                         |

**Supplemental Table V. Changes of intercellular adhesion molecules by TNF- $\alpha$  treatment**

| Gene name  | log <sub>2</sub> (FC) | negative log <sub>10</sub> (P.Value) |
|------------|-----------------------|--------------------------------------|
| CDH5 **    | 0.09                  | 0.21                                 |
| CTNNA1     | 0.04                  | 0.15                                 |
| CTNNB1     | -0.02                 | 0.03                                 |
| CTNND1     | 0.03                  | 0.09                                 |
| NECTIN1    | -0.08                 | 0.15                                 |
| NECTIN2 ** | 0.01                  | 0.03                                 |
| NECTIN3    | -0.06                 | 0.15                                 |
| AFDN **    | -0.03                 | 0.1                                  |
| PECAM1 **  | -0.03                 | 0.07                                 |
| TJP1 **    | -0.05                 | 0.12                                 |
| TJP2       | 0.04                  | 0.12                                 |
| OCLN       | 0.21                  | 0.26                                 |
| CLDN11     | 0.15                  | 0.17                                 |
| CLDN15     | 0.06                  | 0.09                                 |
| CLDN10     | -0.23                 | 0.1                                  |
| CLDN12     | -0.12                 | 0.3                                  |
| CLDN14     | 0.31                  | 0.52                                 |
| CLDN1      | 0.38                  | 0.44                                 |
| CLDN3      | 0.20                  | 0.16                                 |
| CLDN7      | 0.08                  | 0.12                                 |
| CLDN5      | -0.25                 | 0.23                                 |
| CLDN4      | -0.11                 | 0.1                                  |
| CD99       | -0.07                 | 0.26                                 |
| JAM3       | -0.13                 | 0.3                                  |
| ACTB       | 0.14                  | 0.28                                 |
| ACTA2      | -0.02                 | 0.03                                 |
| ACTA1      | 0.19                  | 0.26                                 |
| ACTG1      | 0.10                  | 0.25                                 |

**Supplemental Table VI. Increase in cell size by septin 2 suppression**

Average cell sizes of HDMVECs infected with shControl and shSeptin 2 with SD are shown. Average cell sizes were calculated with cells from 3 independent experiments with triplicates for each experiment (N=1764 cells for shControl and N=1138 cells for shSeptin 2).

| <b>Cell sizes (<math>\mu\text{m}^2/\text{cell}</math>)</b> |                     |
|------------------------------------------------------------|---------------------|
| <b>shControl</b>                                           | <b>shSeptin 2</b>   |
| 1688.3 $\pm$ 36.47                                         | 2869.0 $\pm$ 276.25 |
